# Supplementary material for: Multi-omic subtypes of Alzheimer’s dementia are differentially associated with psychological traits
Source: bioRxiv preprint, doi:10.1101/2025.02.21.639584, version 1 (2025-02-26)
Supplement: Supplementary Material [file 639584_file07.docx]

**Supplementary Material**

**Tables**

**eTable1.** Number of pathologies stratified by no cognitive impairment (NCI) and AD subtypes.

| Frequency of pathologies | NCI | AD subtype 1 | AD subtype 2 | AD subtype 3 |
| --- | --- | --- | --- | --- |
|  | N (%) | N (%) | N (%) | N (%) |
| 0 | 34 (13.4) | 1 (0.6) | 6 (3.3) | 6 (3.3) |
| 1 | 65 (25.7) | 25 (14.5) | 19 (10.6) | 19 (12.4) |
| 2 | 70 (27.7) | 34 (19.7) | 32 (17.8) | 27 (17.6) |
| 3 | 48 (19.0) | 37 (21.4) | 36 (20.0) | 30 (19.6) |
| 4 | 21 (8.3) | 36 (20.8) | 39 (21.7) | 33 (21.6) |
| 5 | 13 (5.1) | 28 (16.2) | 24 (13.3) | 27 (17.6) |
| 6 | 1 (0.4) | 6 (3.5) | 16 (8.9) | 10 (6.5) |
| 7 | 1 (0.4) | 6 (3.5) | 7 (3.9) | 2 (1.3) |
| 8 | 0 | 0 | 0 | 0 |
| 9 | 0 | 0 | 1 (0.6) | 0 |

**eTable 2.** Full list of omic signals contributing to the three AD subtypes at FDR *p* <0.05.

| **AD subtype 1** | **AD subtype 2** | **AD subtype 3** |
| --- | --- | --- |
| | Metabolite -> PC ae C38:4 | | --- | | Metabolite -> PC aa C36:0 | | Metabolite -> PC aa C24:0 | | Metabolite -> lysoPC a C28:0 | | Metabolite -> PC ae C36:1 | | Metabolite -> PC ae C42:3 | | Metabolite -> Met | | Metabolite -> PC ae C44:3 | | Metabolite -> lysoPC a C26:0 | | Metabolite -> PC aa C40:4 | | Metabolite -> lysoPC a C24:0 | | Metabolite -> PC aa C42:5 | | Metabolite -> PC ae C40:4 | | Metabolite -> PC ae C40:5 | | Metabolite -> Cit | | Metabolite -> PC aa C26:0 | | Metabolite -> PC ae C36:0 | | Metabolite -> PC ae C38:3 | | Metabolite -> C14:2-OH | | Metabolite -> C14:1-OH | | Metabolite -> PC aa C42:4 | | Metabolite -> His | | Metabolite -> PC ae C44:6 | | Metabolite -> PC ae C30:0 | | Metabolite -> PC ae C38:2 | | Metabolite -> C10 | | Metabolite -> PC ae C34:1 | | Metabolite -> PC aa C30:0 | | Metabolite -> C14:2 | | Metabolite -> lysoPC a C26:1 | | Metabolite -> Orn | | Metabolite -> SDMA | | Metabolite -> PC aa C40:3 | | Metabolite -> lysoPC a C28:1 | | Metabolite -> PC ae C36:4 | | Metabolite -> PC ae C36:2   | RNA -> FXYD7 | | --- | | RNA -> S100PBP | | RNA -> LOC642450 | | RNA -> TFPT | | RNA -> TRIML2 | | RNA -> C21ORF34 | | RNA -> GRK4 | | RNA -> WDR19 | | RNA -> PLAC8L1 | | RNA -> NSUN5C | | RNA -> SNRP70 | | RNA -> MAST1 | | RNA -> TMEM50A | | RNA -> FLJ39061 | | RNA -> MYADM | | RNA -> FNBP4 | | RNA -> HS.391327 | | RNA -> MESP1 | | RNA -> HS.538763 | | RNA -> LOC651125 | | RNA -> HSPC111 | | RNA -> IDUA | | RNA -> C21ORF114 | | RNA -> MGC27345 | | RNA -> LOC650155 | | RNA -> TNFRSF25 | | RNA -> LOC388237 | | RNA -> HS.458154 | | RNA -> HS.532239 | | RNA -> NPIP | | RNA -> LST-3TM12 | | RNA -> PDE5A | | RNA -> KRT13 | | RNA -> LAMA5 | | RNA -> LAMA3 | | RNA -> LOC731042 | | RNA -> ELL3 | | RNA -> NXF1 | | RNA -> TRAPPC6A | | RNA -> PSMD5 | | RNA -> HS.576530 | | RNA -> CAPNS1 | | RNA -> CHKB | | RNA -> HS.581313 | | RNA -> ABL2 | | RNA -> TAZ | | RNA -> GOLGA8G | | RNA -> PBX4 | | RNA -> SIL1 | | RNA -> HIST1H2BO | | RNA -> MYOC | | RNA -> HS.407028 | | RNA -> HSF4 | | RNA -> LOC647371 | | RNA -> ZNF649 | | RNA -> GTPBP8 | | RNA -> SCPEP1 | | RNA -> HS.105791 | | RNA -> LOC650887 | | RNA -> LOC652168 | | RNA -> POLR3F | | RNA -> SETD2 | | RNA -> HS.570762 | | RNA -> ACADVL | | RNA -> LOC644143 | | RNA -> TPPP3 | | RNA -> LOC642980 | | RNA -> TIMM17B | | RNA -> TENC1 | | RNA -> C14ORF148 | | RNA -> MBTPS1 | | RNA -> PTPRE | | RNA -> CCDC43 | | RNA -> FLJ41481 | | RNA -> GTF2IRD2B | | RNA -> HS.559929 | | RNA -> HS.314177   | DNAm -> cg11278506 | | --- | | DNAm -> cg10104252 | | DNAm -> cg14074486 | | DNAm -> cg22176017 | | DNAm -> cg11995069 | | DNAm -> cg26709695 | | DNAm -> cg15850287 | | DNAm -> cg16668548 | | DNAm -> cg25664220 | | DNAm -> cg08277100 | | DNAm -> cg19360330 | | DNAm -> cg20911707 | | DNAm -> cg13027384 | | DNAm -> cg15077558 | | DNAm -> cg18574476 | | DNAm -> cg07285896 | | DNAm -> cg17204018 | | DNAm -> cg23517743 | | DNAm -> cg05005586 | | DNAm -> cg14664242 | | DNAm -> cg00678938 | | DNAm -> cg08005122 | | DNAm -> cg25061682 | | DNAm -> cg04134031 | | DNAm -> cg23894539 | | DNAm -> cg05809481 | | DNAm -> cg14270725 | | DNAm -> cg16652332 | | DNAm -> cg00844791 | | DNAm -> cg13638257 | | DNAm -> cg06002947 | | DNAm -> cg01809217 | | DNAm -> cg23002008 | | DNAm -> cg12833207 | | DNAm -> cg06565615 | | DNAm -> cg08030134 | | DNAm -> cg19131647 | | DNAm -> cg17696847 | | DNAm -> cg08787039 | | DNAm -> cg00167958 | | DNAm -> cg02186298 | | DNAm -> cg06837765 | | DNAm -> cg22425711 | | DNAm -> cg26875637 | | DNAm -> cg15964611 | | DNAm -> cg05682952 | | DNAm -> cg21951594 | | DNAm -> cg20801456 | | DNAm -> cg01233948 | | DNAm -> cg22222413 | | DNAm -> cg17623882 | | DNAm -> cg19045313 | | DNAm -> cg00719108 | | DNAm -> cg00517796 | | DNAm -> cg07537581 | | DNAm -> cg18426156 | | DNAm -> cg21202355 | | DNAm -> cg22839075 | | DNAm -> cg17961892 | | DNAm -> cg14019695 | | DNAm -> cg09126038 | | DNAm -> cg06529685 | | DNAm -> cg24080119 | | DNAm -> cg17847344 | | DNAm -> cg03978041 | | DNAm -> cg06514855 | | DNAm -> cg26383138 | | DNAm -> cg16877615 | | DNAm -> cg13126315 | | DNAm -> cg00730653 | | DNAm -> cg25623271 | | DNAm -> cg07366506 | | DNAm -> cg01173186 | | DNAm -> cg02225716 | | DNAm -> cg26404886 | | DNAm -> cg09002677 | | DNAm -> cg23601614 | | DNAm -> cg06684407 | | DNAm -> cg20586124 | | DNAm -> cg27102141 | | DNAm -> cg10805850 | | DNAm -> cg27364588 | | DNAm -> cg09602803 | | DNAm -> cg02319733 | | DNAm -> cg24702091 | | DNAm -> cg09914513 | | DNAm -> cg19727817 | | DNAm -> cg02498382 | | DNAm -> cg21624342 | | DNAm -> cg14866339 | | DNAm -> cg15866213 | | DNAm -> cg10736454 | | DNAm -> cg02661886 | | DNAm -> cg15646626 | | DNAm -> cg00081729 | | DNAm -> cg10333808 | | DNAm -> cg03070187 | | DNAm -> cg19783404 | | DNAm -> cg01382100 | | DNAm -> cg18504937 | | DNAm -> cg10427793 | | DNAm -> cg14366742 | | DNAm -> cg17437621 | | DNAm -> cg15336438 | | DNAm -> cg00047185 | | DNAm -> cg07003632 | | DNAm -> cg11942329 | | DNAm -> cg27357865 | | DNAm -> cg22429418 | | DNAm -> cg27085265 | | DNAm -> cg19701084 | | | Protein -> NDUFA10_1 | | --- | | Protein -> HSPA8_1 | | Protein -> DOCK2 | | Protein -> NDUFV1_2 | | Protein -> CD44 | | Protein -> CBX1_2 | | Protein -> NDUFA5_2 | | Protein -> SYT7 | | Protein -> BIN1_4 | | Protein -> ATP5J2_1 | | Protein -> PLXNB1 | | Protein -> PADI2 | | | | | | Metabolite -> lysoPC a C20:3 | | --- | | Metabolite -> PC aa C36:6 | | Metabolite -> LCA | | Metabolite -> lysoPC a C17:0 | | Metabolite -> HDCA | | Metabolite -> PC aa C36:5   | RNA -> POLDIP3 | | --- | | RNA -> SARS | | RNA -> LOC399715 | | RNA -> SMTN | | RNA -> FRMPD2L2 | | RNA -> NDUFC2 | | RNA -> UHRF1 | | RNA -> FGF18 | | RNA -> SUNC1 | | RNA -> HS.213541 | | RNA -> PRKCH | | RNA -> TAS2R10 | | RNA -> HS.570326 | | RNA -> DDIT4 | | RNA -> CLYBL | | RNA -> STARD10 | | RNA -> ADNP2 | | RNA -> LOC650557 | | RNA -> MIB2 | | RNA -> LOC642521 | | RNA -> PLOD2 | | RNA -> TUBGCP5 | | RNA -> FAM59B | | RNA -> GAL3ST3 | | RNA -> EIF2B2 | | RNA -> PEPD | | RNA -> TOR1AIP2 | | RNA -> CHCHD6 | | RNA -> ISYNA1 | | RNA -> C5ORF15 | | RNA -> HS.583388 | | RNA -> NOLA2 | | RNA -> ACOT7 | | RNA -> TUBA1A | | RNA -> GABBR1 | | RNA -> AQP11 | | RNA -> HS.145490 | | RNA -> FGF22 | | RNA -> SERPINF1 | | RNA -> ZNF215 | | RNA -> NAV2 | | RNA -> NFKB1 | | RNA -> AFF1 | | RNA -> AGFG2 | | RNA -> LOC651403 | | RNA -> CIB3 | | RNA -> POLR1E | | RNA -> ASCL1 | | RNA -> NR1I2 | | RNA -> RFC2 | | RNA -> CSDE1 | | RNA -> INO80B | | RNA -> PRG-3 | | RNA -> MED12 | | RNA -> HS.577965 | | RNA -> SOX21 | | RNA -> C11ORF76 | | RNA -> CDCA5 | | RNA -> HS.72367 | | RNA -> NTAN1 | | RNA -> LOC648364 | | RNA -> HOXC9 | | RNA -> UBE2D2 | | RNA -> LOC647096 | | RNA -> MPP2 | | RNA -> HS.567677 | | RNA -> HS.284464 | | RNA -> ZIC2 | | RNA -> HS.218036 | | RNA -> THOC5 | | RNA -> MTMR15 | | RNA -> AK3L1 | | RNA -> LRP8 | | RNA -> LOC646424 | | RNA -> ITPR2 | | RNA -> HIST1H2AH | | RNA -> CLCNKA | | RNA -> PRTG | | RNA -> PVRL1 | |  | DNAm -> cg06481431 | | --- | | DNAm -> cg23449791 | | DNAm -> cg01553632 | | DNAm -> cg27609489 | | DNAm -> cg26366347 | | DNAm -> cg10678190 | | DNAm -> cg23044017 | | DNAm -> cg17949455 | | DNAm -> cg26361052 | | DNAm -> cg15830613 | | DNAm -> cg27059537 | | DNAm -> cg03383411 | | DNAm -> cg09298623 | | DNAm -> cg09798879 | | DNAm -> cg05505765 | | DNAm -> cg02081006 | | DNAm -> cg24433722 | | DNAm -> cg09329930 | | DNAm -> cg17512802 | | DNAm -> cg08439487 | | DNAm -> cg11348257 | | DNAm -> cg14757157 | | DNAm -> cg21463140 | | DNAm -> cg25932315 | | DNAm -> cg20777398 | | DNAm -> cg06145909 | | DNAm -> cg10269439 | | DNAm -> cg10679147 | | DNAm -> cg03139898 | | DNAm -> cg22682162 | | DNAm -> cg04515001 | | DNAm -> cg18050892 | | DNAm -> cg25691070 | | DNAm -> cg20638583 | | DNAm -> cg10215032 | | DNAm -> cg12652440 | | DNAm -> cg03907174 | | DNAm -> cg13602232 | | DNAm -> cg10409449 | | DNAm -> cg00934092 | | DNAm -> cg07470275 | | DNAm -> cg20659418 | | DNAm -> cg01021245 | | DNAm -> cg15927357 | | DNAm -> cg21438018 | | DNAm -> cg00425078 | | DNAm -> cg13704531 | | DNAm -> cg15899474 | | DNAm -> cg00056541 | | DNAm -> cg09114441 | | DNAm -> cg24675344 | | DNAm -> cg23288653 | | DNAm -> cg00500770 | | DNAm -> cg07604651 | | DNAm -> cg10607599 | | DNAm -> cg01527159 | | DNAm -> cg06636220 | | DNAm -> cg03713379 | | DNAm -> cg16514818 | | DNAm -> cg18225991 | | DNAm -> cg11946072 | | DNAm -> cg13657785 | | DNAm -> cg16588302 | | DNAm -> cg14186824 | | DNAm -> cg06177627 | | DNAm -> cg11361049 | | DNAm -> cg06238921 | | DNAm -> cg14531038 | | DNAm -> cg13715862 | | DNAm -> cg21772773 | | DNAm -> cg17918227 | | DNAm -> cg00711351 | | DNAm -> cg10128511 | | DNAm -> cg11491504 | | DNAm -> cg08108051 | | DNAm -> cg16293105 | | DNAm -> cg03339854 | | DNAm -> cg16465560 | | DNAm -> cg26672159 | | DNAm -> cg08459169 | | DNAm -> cg08573295 | | DNAm -> cg15643885 | | DNAm -> cg24319892 | | DNAm -> cg07850896 | | DNAm -> cg13162581 | | DNAm -> cg16622920 | | DNAm -> cg04144911 | | DNAm -> cg02919960 | | DNAm -> cg24673043 | | DNAm -> cg12695615 | | DNAm -> cg20644084 | | DNAm -> cg14872580 |  | Protein -> C9orf16_2 | | --- | | Protein -> BIN1_9 | | Protein -> BIN1_7 | | Protein -> PIK3R1_1 | | Protein -> AP2B1_2 | | Protein -> SNAP29 | | Protein -> ELMO1_2 | | Protein -> MLF2_2 | | Protein -> SYN1 | | | Metabolite -> Glu | | --- | | Metabolite -> Ala | | Metabolite -> TwMCA | | Metabolite -> Val | | Metabolite -> Creatinine | | Metabolite -> lysoPC a C |  | RNA -> LOC731950 | | --- | | RNA -> MRPS16 | | RNA -> RFWD2 | | RNA -> SNORD56 | | RNA -> HS.581083 | | RNA -> HS.583637 | | RNA -> TBX20 | | RNA -> HS.156241 | | RNA -> HS.481464 | | RNA -> LPIN2 | | RNA -> UBAP1 | | RNA -> BRD9 | | RNA -> LAMA3 | | RNA -> CLCNKA | | RNA -> HS.564742 | | RNA -> GPKOW | | RNA -> HS.145476 | | RNA -> ARPC5 | | RNA -> WSB2 | | RNA -> BCL2L13 | | RNA -> WBP1 | | RNA -> HDHD2 | | RNA -> TOMM40L | | RNA -> MANBAL | | RNA -> NRSN2 | | RNA -> GCDH | | RNA -> ABCF2 | | RNA -> DNAJC5B | | RNA -> ACSL4 | | RNA -> C8ORF22 | | RNA -> HS.545454 | | RNA -> FIBP | | RNA -> PYCRL | | RNA -> GSTZ1 | | RNA -> PARD6G | | RNA -> TRIAP1 | | RNA -> HS.294603 | | RNA -> JOSD1 | | RNA -> SDCCAG3 | | RNA -> CST1 | | RNA -> SPTBN4 | | RNA -> BEAN | | RNA -> S100A13 | | RNA -> GABARAP | | RNA -> HS.539959 |  | DNAm -> cg06071660 | | --- | | DNAm -> cg19961277 | | DNAm -> cg27567587 | | DNAm -> cg16306508 | | DNAm -> cg21356750 | | DNAm -> cg14023762 | | DNAm -> cg05937687 | | DNAm -> cg03661929 | | DNAm -> cg03563694 | | DNAm -> cg14191675 | | DNAm -> cg10384134 | | DNAm -> cg04414459 | | DNAm -> cg12756244 | | DNAm -> cg09765463 | | DNAm -> cg19645248 | | DNAm -> cg05313918 | | DNAm -> cg21201272 | | DNAm -> cg03022609 | | DNAm -> cg03284175 | | DNAm -> cg00943950 | | DNAm -> cg04112626 | | DNAm -> cg08317267 | | DNAm -> cg22758189 | | DNAm -> cg16641000 | | DNAm -> cg19192649 | | DNAm -> cg08169778 | | DNAm -> cg20735988 | | DNAm -> cg10701733 | | DNAm -> cg07312485 | | DNAm -> cg15260780 | | DNAm -> cg06688409 | | DNAm -> cg09339907 | | DNAm -> cg20863107 | | DNAm -> cg12071888 | | DNAm -> cg19598875 | | DNAm -> cg19124521 | | DNAm -> cg07402261 | | DNAm -> cg06704539 | | DNAm -> cg00397144 | | DNAm -> cg12353428 | | DNAm -> cg21276022 | | DNAm -> cg08213351 | | DNAm -> cg14488256 | | DNAm -> cg07529658 | | DNAm -> cg05247112 | | DNAm -> cg23333911 | | DNAm -> cg00632861 | | DNAm -> cg24778130 | | DNAm -> cg10555010 | | DNAm -> cg00569056 | | DNAm -> cg03205103 | | DNAm -> cg13602813 | | DNAm -> cg25784395 | | DNAm -> cg21858823 | | DNAm -> cg24674754 | | DNAm -> cg12207450 | | DNAm -> cg27428418 | | DNAm -> cg00124774 | | DNAm -> cg24034106 | | DNAm -> cg10736063 | | DNAm -> cg15824316 | | DNAm -> cg19497501 | | DNAm -> cg26149167 | | DNAm -> cg14889329 | | DNAm -> cg26436829 | | DNAm -> cg14983606 | | DNAm -> cg07201319 | | DNAm -> cg21453656 | | DNAm -> cg25407736 | | DNAm -> cg16878027 | | DNAm -> cg04570362 | | DNAm -> cg03333286 | | DNAm -> cg20808078 | | DNAm -> cg07492518 | | DNAm -> cg02990705 | | DNAm -> cg17337483 | | DNAm -> cg24854787 | | DNAm -> cg27008565 | | DNAm -> cg15211499 | | DNAm -> cg24777572 | | DNAm -> cg25367890 | | DNAm -> cg26777809 | | DNAm -> cg22253078 | | DNAm -> cg14874936 | | DNAm -> cg02491199 | | DNAm -> cg03563083 | | DNAm -> cg07509323 | | DNAm -> cg24928681 | | DNAm -> cg09946915 | | DNAm -> cg05562381 |  | Protein -> CLTA_1 | | --- | | Protein -> LDHA_2 | | Protein -> BIN1_3 | | Protein -> STX12 | | Protein -> STXBP1_3 | | Protein -> SNAP25_6 | |

**eTable 3.** Mean F-values in percentages (95%CIs) for each omic modality by AD subtypes.

| **AD subtype** | **Epigenomic** | **Transcriptomic** | **Proteomic** | **Metabolomic** |
| --- | --- | --- | --- | --- |
|  | **Mean (95%CI)** | **Mean (95%CI)** | **Mean (95%CI)** | **Mean (95%CI)** |
| **1** | 8.8 (8.3-9.4) | 14.1 (12.8-15.5) | 6.9 (5.7-8.0) | 41.5 (35.9-47.1) |
| **2** | 22.4 (20.5-24.3) | 34.6 (31.5–37.6) | 15.1 (11.8-18.3) | 81.2 (69.7-92.6) |
| **3** | 12.3 (11.1-13.4) | 15.5 (14.1-17.1) | 7.1 (5.7-8.2) | 63.7 (39.6-87.8) |

**Note.** Higher f-value show stronger differences from the NCI.

**eTable 4.** Post-hoc comparisons using Bonferroni’s method for inter-subtype differences on the F-value which represents significantly different features from the no cognitive impairment group.

|  | **Subtype-subtype comparisons** | **Difference in means on the F-value (%)** | **95% CI** | | ***p*** |
| --- | --- | --- | --- | --- | --- |
| **Metabolites** | **1 – 2** | **39.7** | **21.6** | **57.7** | **<0.001** |
|  | **1 – 3** | **22.3** | **4.2** | **40.3** | **0.013** |
|  | 2 – 3 | 17.5 | -6.2 | 41.1 | .184 |
| **RNAseq** | **1 – 2** | **20.6** | **17.0** | **24.2** | **<0.001** |
|  | 1 – 3 | 1.6 | 2.6 | 5.7 | 1.00 |
|  | **2 – 3** | **19.0** | **14.9** | **23.2** | **<0.001** |
| **CpGs** | **1 – 2** | **13.9** | **11.9** | **15.8** | **<0.001** |
|  | **1 – 3** | **3.4** | **1.5** | **5.4** | **<0.001** |
|  | **2 – 3** | **10.5** | **8.4** | **12.5** | **<0.001** |
| **Proteins** | **1 – 2** | **8.2** | **5.2** | **11.3** | **<0.001** |
|  | 1 – 3 | 0.09 | -3.4 | 3.6 | 1.00 |
|  | **2 – 3** | **8.1** | **4.4** | **11.8** | **<0.001** |

**Note.** The largest inter-subtype differential F-values relative to NCI were consistently seen between AD subtype 1 and AD subtype 2 with differences in F-values ranging from 8% for proteomic alterations to 40% for metabolomic differences with AD subtype 2 consistently showing higher differential values from AD subtype 1. The smallest inter-subtype differences were observed for AD subtypes 1 and 3 with differences ranging from only 0.1% for proteomics differences to 22% for metabolomic differences differentiating them from NCI. Indeed, no significant differences were observed between AD subtypes 1 and 3 for proportions of RNA and proteomic alterations.

**eTable 5.** Post-hoc comparisons using Bonferroni’s test for mean score subtype-subtype comparisons on neuroticism, depressive symptoms, loneliness, and purpose in life.

| **Measure** | **Subtype-subtype comparisons** | **Difference in means** | **95% CI** | | ***p*** |
| --- | --- | --- | --- | --- | --- |
| **Neuroticism** | **0 – 1** | **2.39** | **0.70** | **4.07** | **0.001** |
|  | 1 – 2 | 1.05 | -1.77 | 2.86 | 0.76 |
|  | 1 – 3 | 0.18 | -1.72 | 2.08 | 1.00 |
|  | 0 – 2 | 1.34 | -3.02 | 0.34 | 0.21 |
|  | 2 – 3 | 0.78 | -2.77 | 1.03 | 1.00 |
|  | **0 – 3** | **2.21** | **0.42** | **4.00** | **0.007** |
| **Depressive symptoms** | 0 – 1 | 0.33 | -0.01 | 0.68 | 0.064 |
|  | 1 – 2 | 0.05 | -0.32 | 0.42 | 1.000 |
|  | 1 – 3 | 0.02 | -0.42 | 0.32 | 1.000 |
|  | **0 – 2** | **0.38** | **0.05** | **0.74** | **0.017** |
|  | 2 – 3 | 0.07 | -0.32 | 0.45 | 1.000 |
|  | 0 – 3 | 0.32 | -0.05 | 0.68 | 0.134 |
| **Loneliness** | 0 – 1 | 0.21 | 0.03 | 0.44 | 0.127 |
|  | 1 – 2 | 0.08 | -0.18 | 0.35 | 1.000 |
|  | 1 – 3 | 0.08 | -0.19 | 0.35 | 1.000 |
|  | 0 – 2 | 0.12 | -0.12 | 0.36 | 1.000 |
|  | 2 – 3 | 0.16 | -0.11 | 0.44 | 0.690 |
|  | **0 – 3** | **0.28** | **0.04** | **0.54** | **0.015** |
| **Purpose in life** | 0 – 1 | 0.17 | -0.01 | 0.34 | 0.073 |
|  | 1 – 2 | 0.01 | -0.18 | 0.21 | 0.21 |
|  | 1 – 3 | 0.01 | -0.19 | 0.21 | 1.00 |
|  | **0 – 2** | **0.18** | **0.001** | **0.35** | **0.048** |
|  | 2 – 3 | 0.02 | -0.18 | 0.23 | 1.000 |
|  | 0 – 3 | 0.15 | -0.03 | 0.34 | 0.171 |

*Note.* 0 denotes the no cognitive impairment group. Bolded rows indicate significant differences.

**Figures**


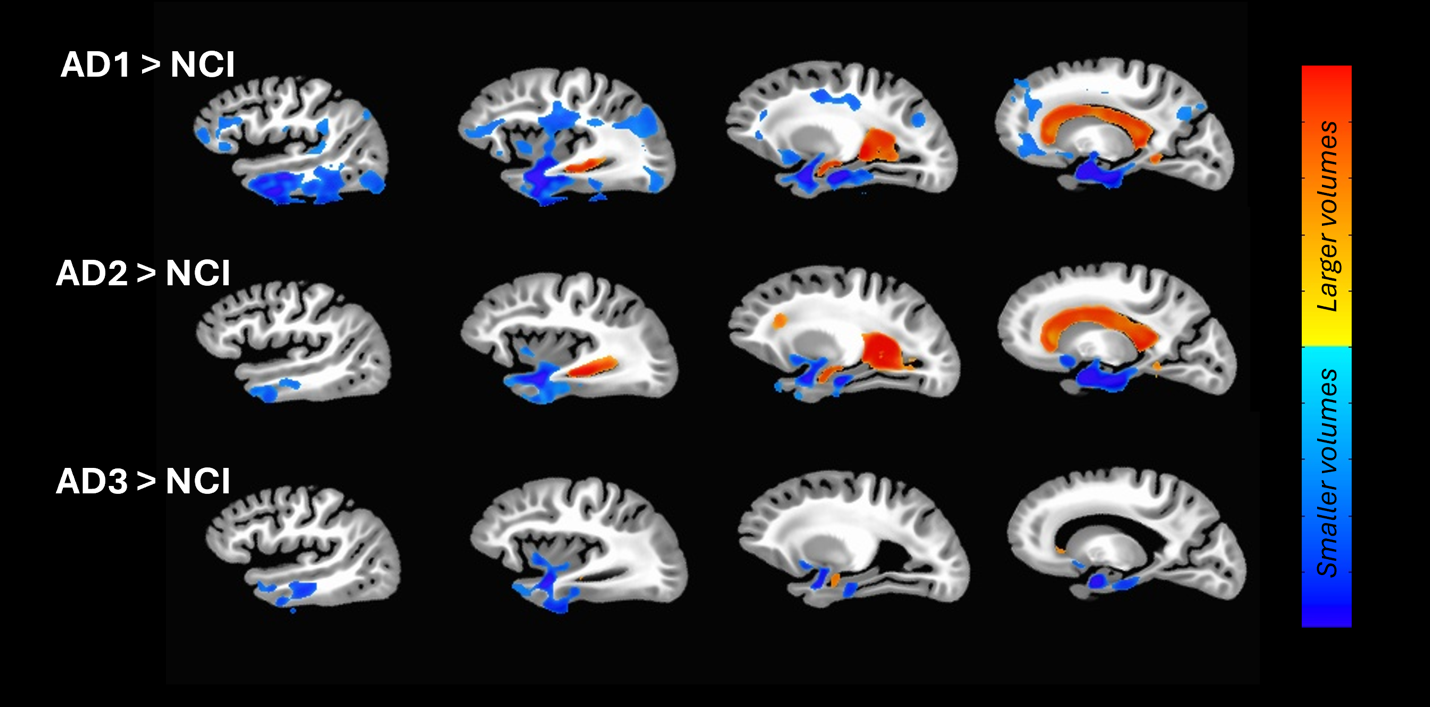


**eFigure 1.** Differences in brain morphology between AD subtypes and the background (FWER *p*≤.05), adjusted for age at death, sex, race, education, postmortem scanning interval and location. Warm and cold colors indicate larger and smaller volumes relative to the background, respectively.
